# Supplementary material
Source: PubMed Central journal article supplement (PMC4255739)

# Characterization of Selective Inhibitors of Matrix Metalloproteinase 13 That Prevent Articular Cartilage Degradation *In Vitro*

Timothy P. Spicer,<sup>[a]</sup> Jianwen Jiang,<sup>[c]</sup> Alexander B. Taylor,<sup>[c]</sup> Jun Yong Choi,<sup>[f]</sup> P. John Hart,<sup>[c,d]</sup>  
William R. Roush,<sup>[f]</sup> Gregg B. Fields,<sup>[b]</sup> Peter S. Hodder<sup>[a][e]</sup>, and Dmitriy Minond,<sup>[a][b]</sup>

[a] Lead Identification Division, Translational Research Institute, The Scripps Research Institute, Scripps Florida

[b] Departments of Chemistry and Biology, Torrey Pines Institute for Molecular Studies, Florida

[c] Department of Biochemistry and the X-ray Crystallography Core Laboratory, University of Texas Health Science Center at San Antonio

[d] Department of Veterans Affairs, South Texas Veterans Health Care System, San Antonio Texas

[e] Department of Molecular Therapeutics, The Scripps Research Institute, Scripps Florida

[f] Department of Chemistry, The Scripps Research Institute, Scripps Florida

Corresponding author: Dmitriy Minond, Departments of Chemistry and Biology, Torrey Pines Institute for Molecular Studies, 11350 SW Village Parkway, Port Saint Lucie, Florida 34987 (USA); Fax: (+1) 772-345-3649; E-mail: [dminond@tpims.org](mailto:dminond@tpims.org)

**SUPPLEMENTAL DATA**

**Table 1. Enzymes and Substrates used in protease profiling of MMP-13 inhibitors.**

| Enzyme name | Peptide substrate | Enzyme Source/Form                                                                                                           | Enzyme Purity     | Supplier    | Cat #    |
|-------------|-------------------|------------------------------------------------------------------------------------------------------------------------------|-------------------|-------------|----------|
| ACE         | _RPFNYLAK_        | Recombinant Human ACE/CD143, Leu30-Leu126 with a C-terminal His-tag, expressed in mammalian cell line                        | >95%, by SDS-PAGE | R&D Systems | 929-ZN   |
| ACE2        | _VYPSP_           | Recombinant Human ACE2, Gln18-Ser740, with a C-terminal His-tag, expressed in mammalian cell line                            | >90%, by SDS-PAGE | R&D Systems | 933-ZN   |
| ADAM10      | _DFVRAARR_        | Recombinant Human ADAM10, Thr214 Glu672, with a C-terminal His-tag, expressed in baculoviral system                          | >90%, by SDS-PAGE | R&D Systems | 936-AD   |
| BACE1       | _SEVNLDAEFRKKRR_  | Recombinant Human beta-Secretase/BACE, full-length, expressed in baculoviral system                                          | ND                | Invitrogen  | P2947    |
| CASPASE 1   | _WEHDGPKR_        | Recombinant Human Asn120-His-404, expressed in E.Coli                                                                        | >90%, by SDS-PAGE | Biomol      | SE-168   |
| CASPASE 2   | _DEVDA_           | Recombinant Human Asn-150-Thr-435, expressed in E.Coli                                                                       | >95%, by SDS-PAGE | Biomol      | SE-175   |
| CASPASE 3   | _DEVDA_           | Recombinant Human Full-length, expressed in E.Coli                                                                           | >95%, by SDS-PAGE | Biomol      | SE-169   |
| CASPASE 5   | _LEHDGP_          | Recombinant Human Gln-122 to Asn-418, expressed in E.Coli                                                                    | >95%, by SDS-PAGE | Biomol      | SE-171   |
| CASPASE 6   | _VEHDGG_          | Recombinant Human Ala-24 to Asn-293, expressed in E.Coli                                                                     | >80%, by SDS-PAGE | Biomol      | SE-170   |
| CASPASE 7   | _DEVDA_           | Recombinant Human Ala-24 to Gln-303, expressed in E.Coli                                                                     | >95%, by SDS-PAGE | Biomol      | SE-177   |
| CATHEPSIN D | _EVNLDAEFRK_      | Native Human                                                                                                                 | >98%, by SDS-PAGE | Calbiochem  | 219394   |
| CATHEPSIN K | _HHQKLVFFAE_      | Recombinant Human, Full length, with C-terminal His-tag, expressed in E.Coli                                                 | >95%, by SDS-PAGE | Calbiochem  | 219461   |
| CATHEPSIN L | _GGALRAG_         | Recombinant Human, Full length, with C-terminal His-tag, expressed in P.Pastoris                                             | >95%, by SDS-PAGE | Calbiochem  | 219382   |
| CATHEPSIN S | _RTLTA_           | Recombinant Human, Full length, expressed in E.Coli                                                                          | >90%, by SDS-PAGE | Calbiochem  | 219343   |
| FACTOR XA   | _ALPRTMFIQ_       | Native Human                                                                                                                 | 100% by SDS-PAAGE | Calbiochem  | 233526   |
| FURIN       | _RRVKRSLD_        | Recombinant Human Furin, Asp108 Glu715, with a C-terminal His-tag, expressed in mammalian cell line                          | >95%, by SDS-PAGE | R&D Systems | 1503-SE  |
| IDE         | _RPPGFSAF_        | Recombinant Human Insulysin/IDE, Met42 Leu1019, with N-terminal His-tag, expressed in baculoviral system                     | >95%, by SDS-PAGE | R&D Systems | 2496-ZN  |
| MMP1        | _GRIGFL_          | Recombinant Human, Phe100-Gln268, Expressed in E.Coli                                                                        | >95%, by SDS-PAGE | Biomol      | SE-180   |
| MMP12       | _GRIGFL_          | Recombinant Human, Phe99-Leu271, Expressed in E.Coli                                                                         | >95%, by SDS-PAGE | Biomol      | SE-138   |
| MMP13       | _GRIGFL_          | Recombinant Human, Tyr104-Asn274, Expressed in E.Coli                                                                        | >95%, by SDS-PAGE | Biomol      | SE-246   |
| MMP14       | _GRIGFL_          | Recombinant Human, Tyr112-Arg298, Expressed in E.Coli                                                                        | >95%, by SDS-PAGE | Biomol      | SE-259   |
| MMP2        | _GRIGFL_          | Recombinant Human, Tyr110-Asp452, Expressed in E.Coli                                                                        | >95%, by SDS-PAGE | Biomol      | SE-237   |
| MMP3        | _GRIGFL_          | Recombinant Human, Phe100-Thr272, Expressed in E.Coli                                                                        | >95%, by SDS-PAGE | Biomol      | SE-109   |
| MMP7        | _GRIGFL_          | Recombinant Human, Tyr95-Lys267, Expressed in E.Coli                                                                         | >95%, by SDS-PAGE | Biomol      | SE-181   |
| MMP8        | _GRIGFL_          | Recombinant Human, Phe99-Gln269, Expressed in E.Coli                                                                         | >90%, by SDS-PAGE | Biomol      | SE-255   |
| MMP9        | _GRIGFL_          | Recombinant Human, Phe107-Pro449, Expressed in E.Coli                                                                        | >95%, by SDS-PAGE | Biomol      | SE-244   |
| NEPRILYSIN  | _TSSVEPY_         | Recombinant Human Neprilysin/CD10, Tyr52-Trp750, with N-terminal His-tag, expressed in mammalian cell line                   | >95%, by SDS-PAGE | R&D Systems | 1182-ZNC |
| TACE        | _PLAQAVRSSSR_     | Recombinant Human TACE/ADAM17, Arg215-Asn671, with a C-terminal His-tag, expressed in baculoviral system                     | >90%, by SDS-PAGE | R&D Systems | 930-ADB  |
| THROMBIN    | _PRILT_           | Recombinant Human Coagulation Factor II/Thrombin, Met1-Glu622, with a C-terminal His-tag, expressed in mammalian cell line   | >95%, by SDS-PAGE | R&D Systems | 1473-SE  |
| UPA         | _GRITSSVEP_       | Recombinant Human uPlasminogen activator/Urokinase, Met1-Leu432, with a C-terminal His-tag, expressed in mammalian cell line | >95%, by SDS-PAGE | R&D Systems | 1310-SE  |

**Table 2. CYP450 Inhibition assays conditions.**

| <b>CYP450 Isoform</b> | <b>Substrate</b> | <b>[S],<br/>μM</b> | <b>[HLM],<br/>mg/mL</b> | <b>Incubation<br/>Time,<br/>min</b> | <b>Metabolite (mass<br/>transition), amu</b> | <b>Internal standard (mass transition),<br/>amu</b>         |
|-----------------------|------------------|--------------------|-------------------------|-------------------------------------|----------------------------------------------|-------------------------------------------------------------|
| CYP1A2                | Tacrine          | 1                  | 0.2                     | 10                                  | 1-hydroxytacrine<br>(215→182)                | Bucetin (224→136)                                           |
| CYP2B6                | Bupropion        | 80                 | 0.2                     | 20                                  | OH-Bupropion<br>(256→139)                    | OH-Bupropion-[D <sub>6</sub> ] (262→244)                    |
| CYP2C8                | Amodiaquine      | 1.5                | 0.02                    | 5                                   | Desethylamodiaquine<br>(330→285)             | Desethylamodiaquine-[D <sub>3</sub> ] (333→285)             |
| CYP2C9                | Diclofenac       | 5                  | 0.05                    | 5                                   | 4'-OH Diclofenac<br>(312→268)                | 4'-OH Diclofenac-[ <sup>13</sup> C <sub>6</sub> ] (316→272) |
| CYP2C19               | (S)-Mephenytoin  | 40                 | 0.3                     | 10                                  | 4'-OH (S)-<br>Mephenytoin<br>(235→150)       | 4'-OH (S)-Mephenytoin-[D <sub>3</sub> ]<br>(238→150)        |
| CYP2D6                | Dextromethorphan | 5                  | 0.1                     | 5                                   | Dextrorphan<br>(258→157)                     | Dextrorphan-[D <sub>3</sub> ] (261→157)                     |
| CYP3A4                | Midazolam        | 3                  | 0.02                    | 5                                   | 1'-OH Midazolam<br>(342→203)                 | 1'-OH Midazolam-[ <sup>13</sup> C <sub>3</sub> ] (347→208)  |
| CYP3A4                | Testosterone     | 50                 | 0.05                    | 10                                  | 6β-OH Testosterone<br>(305→269)              | 6β-OH Testosterone-[D <sub>7</sub> ] (312→276)              |

**Table 3:** X-ray data collection and protein structure refinement statistics.

---

| <b>Data collection</b>                     |                       |
|--------------------------------------------|-----------------------|
| Space group                                | C2                    |
| <i>a</i> (Å)                               | 135.3                 |
| <i>b</i> (Å)                               | 36.0                  |
| <i>c</i> (Å)                               | 95.8                  |
| β (°)                                      | 130.2                 |
| Resolution range (Å) <sup>a</sup>          | 47.8-1.66 (1.75-1.66) |
| Wavelength (Å)                             | 0.97950               |
| Redundancy                                 | 3.7 (3.8)             |
| Completeness (%)                           | 98.5 (99.0)           |
| <i>I</i> / $\sigma$ <i>I</i>               | 15.2 (2.0)            |
| <i>R</i> <sub>sym</sub> (%) <sup>b</sup>   | 5.2 (59.0)            |
| Wilson value                               | 26.3                  |
| <br>                                       |                       |
| <b>Refinement</b>                          |                       |
| Number of monomers/AU                      | 2                     |
| <i>R</i> <sub>cryst</sub> (%) <sup>c</sup> | 13.4                  |
| <i>R</i> <sub>free</sub> (%) <sup>d</sup>  | 19.9                  |
| Rmsd bonds (Å)                             | 0.005                 |
| Rmsd angles (°)                            | 0.939                 |
| Ramachandran outliers (%) <sup>e</sup>     | 0.6                   |
| No. protein atoms                          | 2,694                 |
| No. solvent atoms                          | 268                   |
| No. ligand atoms                           | 99                    |
| Avg. protein B-factors (Å <sup>2</sup> )   | 32.3                  |
| Avg. solvent B-factors (Å <sup>2</sup> )   | 45.5                  |
| Avg. ligand B-factors (Å <sup>2</sup> )    | 48.8                  |

---

<sup>a</sup>The number in parentheses is for the highest resolution bin. <sup>b</sup> $R_{\text{sym}} = \sum_{hkl} |I - \langle I \rangle| / \sum_{hkl} \langle I \rangle$  where *I* is the observed intensity and  $\langle I \rangle$  is the average intensity of multiple symmetry-related observations of that reflection. <sup>c</sup> $R_{\text{cryst}} = \sum_{hkl} ||F_{\text{obs}}| - |F_{\text{calc}}|| / \sum_{hkl} |F_{\text{obs}}|$ . <sup>d</sup> $R_{\text{free}} = \sum_{hkl} ||F_{\text{obs},t}| - |F_{\text{calc}}|| / \sum_{hkl} |F_{\text{obs},t}|$  where  $|F_{\text{obs},t}|$  is from a test set not used in the structural refinement. <sup>e</sup>Ramachandran plots were calculated using COOT.

**PDB ID: 4L19**

Supplemental Figures.

Supplemental Figure 1.

**Supplemental Figure 1.** (A) MMP-12 dose response results for the compound Q series. (B) Cathepsin K dose response results for compound Q series.

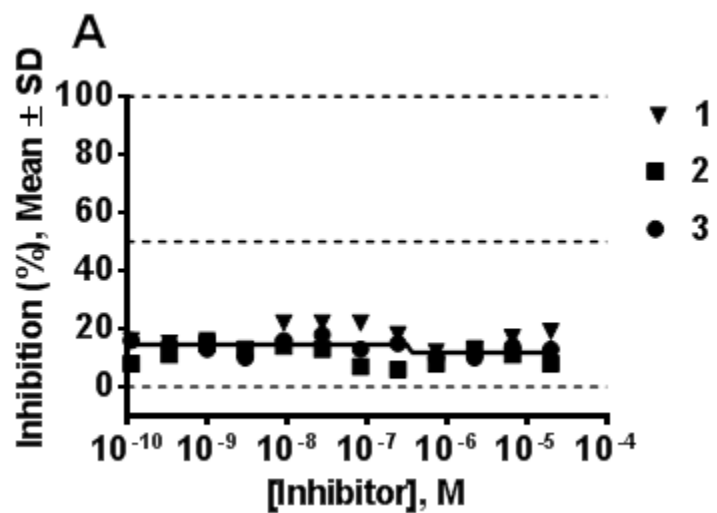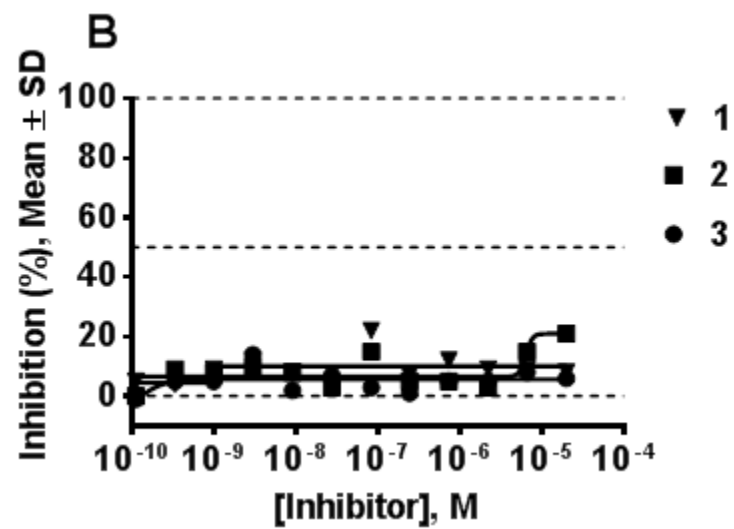

Supplement: jm501284e_si_001.pdf [file jm501284e_si_001.pdf]
